# Supplementary material for: Development of LbL biopolymer capsules as a delivery system for the multilayer-assembled anti-inflammatory substance α1-antitrypsin
Source: Royal Society of Chemistry journal article supplement (doi:10.1039/c3tb20390e), 2013-01-01
Supplement: c3tb20390e.pdf [file c3tb20390e.pdf]

## Supplement

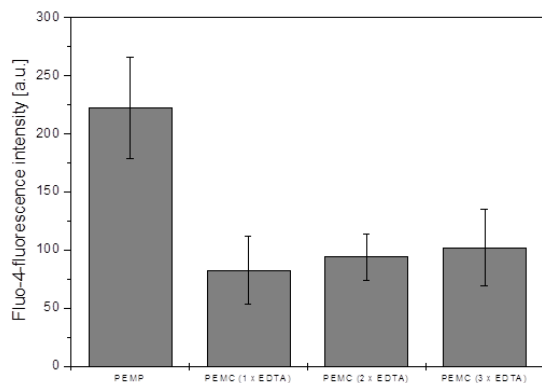

**Fig.9** FCM detection of the remaining Ca ions within the capsules while processing the core dissolution. In contrast to figure 2, the number of EDTA incubation steps was increased and each step was followed by only one washing step. As can be seen, an increasing EDTA treatment does not necessarily result in better core dissolution.

10

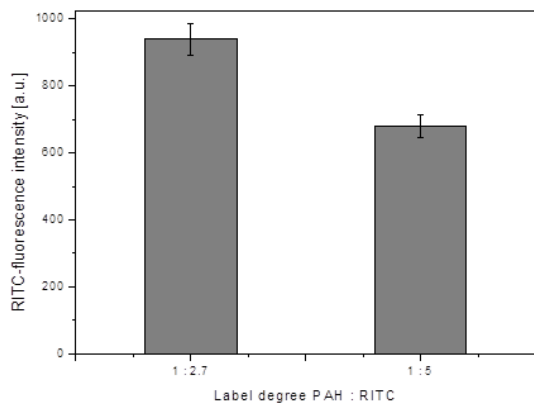

**Fig. 10** FCM investigation of quenching effects caused by an increasing label degree of RITC:PAH. PAH-RITC and PSS were used as constituents of a SiO<sub>2</sub>-multilayer following the scheme: SiO<sub>2</sub>: PAH/PSS/PAH/PSS/PAH-RITC/PSS.

15
